# Supplementary material for: Two independent LAMP assays for rapid identification of the serpentine leafminer, Liriomyza huidobrensis (Blanchard, 1926) (Diptera: Agromyzidae) in Australia
Source: Sci Rep. 2023 Dec 15;13:22286. doi: 10.1038/s41598-023-49472-9 (PMC10721864; doi:10.1038/s41598-023-49472-9)
Supplement: Supplementary file 2 — Supplementary Table S1. [file 41598_2023_49472_MOESM2_ESM.xlsx]

## Sheet: Lab Sheet
Supplementary Table S1. Details of specimens used in our study, including the BOLD process ID, Sample ID, Barcode Index Number (BIN), GenBank accession number for COI and CAD gene regions, collection details and LAMP test results. Samples marked with asterisk were tested with multiplexed COI2377 and CAD263 LAMP assays. Further details of these samples can be found in BOLD dataset DS-SLMWW. NT: no…
Original order	BOLD Process ID	Sample ID	BIN	Life Stage	State/Province	Exact Site	Latitude (N)	Longitude €	Morphological ID	ID based on sequence	Host species	COI GenBank accession NO.	CAD GenBank accession NO.	COI2377	Anneal	CAD263	Anneal
1	SLMWW001-22	ww28601	BOLD:AAV3970	Adult	Queensland	Wyreema	-27.6386	151.863	Agromyzidae	Scaptomyza australis	Brassica weed	OR038642		Negative		Negative
2	SLMWW002-22	ww28602	BOLD:AAD8670	Adult	Queensland	Wyreema	-27.6386	151.863	Agromyzidae sp.	Liriomyza huidobrensis	Brassica weed	OR038542	OR038676	4.2951	82.49	9.17907	84.53
3	SLMWW003-22	ww28603	BOLD:AAF6806	Adult	Queensland	Wyreema	-27.6386	151.863	Agromyzidae sp.	Liriomyza brassicae	Brassica weed	OR038474	OR038674	Negative		Negative
4	SLMWW004-22	ww28604	BOLD:AAV3970	Adult	Queensland	Wyreema	-27.6386	151.863	Agromyzidae	Scaptomyza australis	Brassica weed	OR038640		Negative		Negative
5	SLMWW005-22	ww28605	BOLD:AAF6806	Adult	Queensland	Wyreema	-27.6386	151.863	Agromyzidae sp.	Liriomyza brassicae	Brassica weed	OR038460	OR038673	Negative		Negative
6	SLMWW006-22	ww28606	BOLD:AAD8670	Adult	Queensland	Harrisville	-27.8132	152.689	Agromyzidae sp.	Liriomyza huidobrensis	Celery	OR038543	OR038677	4.54809	82.45	8.48382	84.52
7	SLMWW007-22	ww28607	BOLD:AAD8670	Adult	Queensland	Harrisville	-27.8132	152.689	Agromyzidae sp.	Liriomyza huidobrensis	Celery	OR038544	OR038678	3.90361	82.43	8.12407	84.52
8	SLMWW008-22	ww28608	BOLD:AAD8670	Adult	Queensland	Harrisville	-27.8132	152.689	Agromyzidae sp.	Liriomyza huidobrensis	Celery	OR038545	OR038679	3.90628	82.44	7.79246	84.54
9	SLMWW009-22	ww28609	BOLD:AAD8670	Adult	Queensland	Harrisville	-27.8132	152.689	Agromyzidae sp.	Liriomyza huidobrensis	Celery	OR038546	OR038680	4.61463	82.49	8.36788	84.55
10	SLMWW010-22	ww28610	BOLD:AAD8670	Adult	Queensland	Harrisville	-27.8132	152.689	Agromyzidae sp.	Liriomyza huidobrensis	Celery	OR038547	OR038681	4.20401	82.47	8.30361	84.53
11	SLMWW011-22	ww28611		Adult	Queensland	Mt Sylvia	-27.7313	152.224	Agromyzidae sp.	Calycomyza humeralis	Curly dock	OR038664		Negative		Negative
12	SLMWW012-22	ww28612	BOLD:AAD8670	Adult	Queensland	Wyreema	-27.6338	151.865	Agromyzidae sp.	Liriomyza huidobrensis	Fat hen	OR038548		4.91294	82.43	8.57151
13	SLMWW013-22	ww28613	BOLD:AER7043	Adult	Queensland	Kensington Grove, Plainlands	-27.5412	152.483	Agromyzidae sp.	Calycomyza humeralis	Flea bane	OR038431		Negative		Negative
14	SLMWW014-22	ww28614	BOLD:AER7043	Adult	Queensland	Kensington Grove, Plainlands	-27.5412	152.483	Agromyzidae sp.	Calycomyza humeralis	Flea bane	OR038432		Negative		Negative
15	SLMWW015-22	ww28615	BOLD:AER7043	Adult	Queensland	Kensington Grove, Plainlands	-27.5412	152.483	Agromyzidae sp.	Calycomyza humeralis	Flea bane	OR038434		Negative		Negative
16	SLMWW016-22	ww28616	BOLD:AER7043	Adult	Queensland	Kensington Grove, Plainlands	-27.5412	152.483	Agromyzidae sp.	Calycomyza humeralis	Flea bane	OR038433		Negative		Negative
17	SLMWW017-22	ww28617	BOLD:AER7043	Adult	Queensland	Kensington Grove, Plainlands	-27.5412	152.483	Agromyzidae sp.	Calycomyza humeralis	Flea bane	OR038435		Negative		Negative
18	SLMWW019-22	ww28619	BOLD:AAR9799	Adult	Queensland	Toowoomba	-27.5215	151.957	Agromyzidae sp.	Chromatomyia syngenesiae	Sow thistle	OR038614		Negative		Negative
19	SLMWW020-22	ww28620	BOLD:AAR9799	Adult	Queensland	Toowoomba	-27.5215	151.957	Agromyzidae sp.	Chromatomyia syngenesiae	Sow thistle	OR038615		Negative		Negative
20	SLMWW021-22	ww28621	BOLD:AAR9799	Adult	Queensland	Toowoomba	-27.5215	151.957	Agromyzidae sp.	Chromatomyia syngenesiae	Sow thistle	OR038616		Negative		Negative
21	SLMWW022-22	ww28622	BOLD:AAR9799	Adult	Queensland	Toowoomba	-27.5215	151.957	Agromyzidae sp.	Chromatomyia syngenesiae	Sow thistle	OR038617		Negative		Negative
22	SLMWW023-22	ww28623	BOLD:AAR9799	pupae	Queensland	Toowoomba	-27.5215	151.957	Agromyzidae sp.	Chromatomyia syngenesiae	Sow thistle	OR038618		Negative		Negative
23	SLMWW024-22	ww28624	BOLD:AAR9799	pupae	Queensland	Toowoomba	-27.5215	151.957	Agromyzidae sp.	Chromatomyia syngenesiae	Sow thistle	OR038619		Negative		Negative
24	SLMWW025-22	ww28625		pupae	Queensland	Toowoomba	-27.5215	151.957	Agromyzidae sp.	Chromatomyia syngenesiae	Sow thistle	OR038672		Negative		Negative
25	SLMWW026-22	ww28626	BOLD:AAR9799	Adult	Queensland	Harrisville	-27.8132	152.689	Agromyzidae sp.	Chromatomyia syngenesiae	Sow thistle	OR038620		Negative		Negative
26	SLMWW027-22	ww28627	BOLD:AAR9799	Adult	Queensland	Harrisville	-27.8132	152.689	Agromyzidae sp.	Chromatomyia syngenesiae	Sow thistle	OR038621		Negative		Negative
27	SLMWW028-22	ww28628	BOLD:AAR9799	Adult	Queensland	Harrisville	-27.8132	152.689	Agromyzidae sp.	Chromatomyia syngenesiae	Sow thistle	OR038596		Negative		Negative
28	SLMWW029-22	ww28629	BOLD:AAR9799	Adult	Queensland	Harrisville	-27.8132	152.689	Agromyzidae sp.	Chromatomyia syngenesiae	Sow thistle	OR038592		Negative		Negative
29	SLMWW030-22	ww28630	BOLD:AAR9799	Adult	Queensland	Harrisville	-27.8132	152.689	Agromyzidae sp.	Chromatomyia syngenesiae	Sow thistle	OR038593		Negative		Negative
30	SLMWW031-22	ww28631	BOLD:AAD8670	Adult	Queensland	Wyreema	-27.6338	151.865	Agromyzidae sp.	Liriomyza huidobrensis	Unknown weed	OR038549	OR038682	4.75368	82.36	8.52716	84.57
31	SLMWW032-22	ww28632	BOLD:AAD8670	Adult	Queensland	Wyreema	-27.6338	151.865	Agromyzidae sp.	Liriomyza huidobrensis	Unknown weed	OR038550	OR038683	4.74627	82.35	8.82865	84.56
32	SLMWW033-22	ww28633	BOLD:AAD8670	Adult	Queensland	Wyreema	-27.6338	151.865	Agromyzidae sp.	Liriomyza huidobrensis	Unknown weed	OR038551	OR038684	4.67762	82.4	8.94902	84.56
33	SLMWW034-22	ww28634		Adult	Queensland	Wyreema	-27.6338	151.865	Agromyzidae sp.	Liriomyza huidobrensis	Unknown weed	OR038670		7.50566	82.35	Negative
34	SLMWW035-22	ww28635	BOLD:AAD8670	Adult	Queensland	Wyreema	-27.6338	151.865	Agromyzidae sp.	Liriomyza huidobrensis	Unknown weed	OR038552	OR038685	3.82296	82.37	7.54264	84.55
35	SLMWW036-22	ww28636		Adult	Queensland	Wyreema	-27.6338	151.865	Agromyzidae sp.	Liriomyza huidobrensis	Silverbeet	OR038553	OR038686	4.21811	82.37	9.6453	84.58
36	SLMWW037-22	ww28637		Adult	Queensland	Wyreema	-27.6338	151.865	Agromyzidae sp.	Liriomyza huidobrensis	Silverbeet	OR038554	OR038687	4.3808	82.42	8.81447	84.52
37	SLMWW038-22	ww28638	BOLD:AAD8670	Adult	Queensland	Wyreema	-27.6338	151.865	Agromyzidae sp.	Liriomyza huidobrensis	Silverbeet	OR038555	OR038688	5.42444	82.41	9.37227	84.55
38	SLMWW039-22	ww28639	BOLD:AAD8670	Adult	Queensland	Wyreema	-27.6338	151.865	Agromyzidae sp.	Liriomyza huidobrensis	Silverbeet	OR038488	OR038675	5.28815	82.42	8.61447	84.55
39	SLMWW040-22	ww28640	BOLD:AAD8670	Adult	Queensland	Wyreema	-27.6338	151.865	Agromyzidae sp.	Liriomyza huidobrensis	Silverbeet	OR038556	OR038689	4.59959	82.41	8.38888	84.51
40	SLMWW041-22	ww28641	BOLD:AAR9799	Adult	New South Wales	Carey Bay	-33.017	151.6	Phytomyza syngenesiae	Chromatomyia syngenesiae	Sonchus spp	OR038633		Negative		Negative
41	SLMWW042-22	ww28642	BOLD:AAR9799	Adult	New South Wales	Carey Bay	-33.017	151.6	Phytomyza syngenesiae	Chromatomyia syngenesiae	Sonchus spp	OR038634		Negative		Negative
42	SLMWW043-22	ww28643	BOLD:AAR9799	Adult	New South Wales	Carey Bay	-33.017	151.6	Phytomyza syngenesiae	Chromatomyia syngenesiae	Sonchus spp	OR038635		Negative		Negative
43	SLMWW044-22	ww28644	BOLD:AAR9799	Adult	New South Wales	Carey Bay	-33.017	151.6	Phytomyza syngenesiae	Chromatomyia syngenesiae	Sonchus spp	OR038636		Negative		Negative
44	SLMWW045-22	ww28645	BOLD:AAR9799	Adult	New South Wales	Carey Bay	-33.017	151.6	Phytomyza syngenesiae	Chromatomyia syngenesiae	Sonchus spp	OR038637		Negative		Negative
45	SLMWW046-22	ww28646	BOLD:AAD8670	Adult	New South Wales	Kemps Creek	-33.881	150.792	Liriomyza huidobrensis	Liriomyza huidobrensis	cucumber	OR038557	OR038690	4.87471	82.41	8.50518	84.52
46	SLMWW047-22	ww28647	BOLD:AAD8670	Adult	New South Wales	Kemps Creek	-33.881	150.792	Liriomyza huidobrensis	Liriomyza huidobrensis	cucumber	OR038558	OR038691	3.76143	82.42	8.06869	84.51
47	SLMWW048-22	ww28648	BOLD:AAD8670	Adult	New South Wales	Kemps Creek	-33.881	150.792	Liriomyza huidobrensis	Liriomyza huidobrensis	cucumber	OR038559	OR038692	4.58487	82.36	8.07648	84.51
48	SLMWW049-22	ww28649	BOLD:AAD8670	Adult	New South Wales	Kemps Creek	-33.881	150.792	Liriomyza huidobrensis	Liriomyza huidobrensis	cucumber	OR038560	OR038693	5.17991	82.45	8.62888	84.49
49	SLMWW050-22	ww28650	BOLD:AAR9799	Adult	New South Wales	Kemps Creek	-33.881	150.792	Agromyzidae sp.	Chromatomyia syngenesiae	Weeds	OR038604		Negative		Negative
51	SLMWW052-22	ww28652	BOLD:AAR9799	Adult	New South Wales	Kemps Creek	-33.881	150.792	Agromyzidae sp.	Chromatomyia syngenesiae	Weeds	OR038606		Negative		Negative
53	SLMWW054-22	ww28654	BOLD:AAR9799	Adult	New South Wales	Rossmore	-33.946	150.772	Agromyzidae sp.	Chromatomyia syngenesiae	Weeds	OR038607		Negative		Negative
54	SLMWW055-22	ww28655	BOLD:AAR9799	Adult	New South Wales	Rossmore	-33.946	150.772	Agromyzidae sp.	Chromatomyia syngenesiae	Weeds	OR038608		Negative		Negative
55	SLMWW056-22	ww28656	BOLD:AAR9799	Adult	New South Wales	Rossmore	-33.946	150.772	Agromyzidae sp.	Chromatomyia syngenesiae	Weeds	OR038609		Negative		Negative
56	SLMWW057-22	ww28657	BOLD:AAR9799	Adult	New South Wales	Rossmore	-33.946	150.772	Agromyzidae sp.	Chromatomyia syngenesiae	Weeds	OR038610		Negative		Negative
57	SLMWW058-22	ww28658	BOLD:AAR9799	Adult	New South Wales	Rossmore	-33.946	150.772	Agromyzidae sp.	Chromatomyia syngenesiae	Weeds	OR038611		Negative		Negative
58	SLMWW059-22	ww28659	BOLD:AAD8670	Adult	New South Wales	Kemps Creek	-33.881	150.792	Liriomyza huidobrensis	Liriomyza huidobrensis	cucumber	OR038561	OR038694	4.91274	82.47	7.27206	84.51
59	SLMWW060-22	ww28660	BOLD:AAD8670	Adult	New South Wales	Kemps Creek	-33.881	150.792	Liriomyza huidobrensis	Liriomyza huidobrensis	cucumber	OR038562	OR038695	5.39073	82.47	8.49301	84.44
60	SLMWW061-22	ww28661		pupae	New South Wales	Kemps Creek	-33.881	150.792	Liriomyza huidobrensis	Liriomyza huidobrensis	cucumber	OR038671		9.81784	82.44	Negative
61	SLMWW062-22	ww28662	BOLD:AAD8670	pupae	New South Wales	Kemps Creek	-33.881	150.792	Liriomyza huidobrensis	Liriomyza huidobrensis	cucumber	OR038563	OR038696	5.41025	82.49	8.42889	84.44
62	SLMWW063-22	ww28663	BOLD:AAD8670	pupae	New South Wales	Kemps Creek	-33.881	150.792	Liriomyza huidobrensis	Liriomyza huidobrensis	cucumber	OR038564	OR038697	5.23504	82.48	8.40317	84.45
63	SLMWW064-22	ww28664		pupae	New South Wales	Kemps Creek	-33.881	150.792	Liriomyza huidobrensis	Not sequenced	cucumber			10.9923	82.38	Negative
64	SLMWW065-22	ww28665		pupae	New South Wales	Kemps Creek	-33.881	150.792	Liriomyza huidobrensis	Not sequenced	cucumber			10.7118	82.42	Negative
65	SLMWW066-22	ww28666	BOLD:AAR9799	Adult	New South Wales	Bathurst	-33.4246	149.578	Agromyzidae sp.	Chromatomyia syngenesiae	shaggy shasta	OR038594		Negative		Negative
66	SLMWW067-22	ww28667	BOLD:AAR9799	Adult	New South Wales	Bathurst	-33.4246	149.578	Agromyzidae sp.	Chromatomyia syngenesiae	shaggy shasta	OR038595		Negative		Negative
67	SLMWW068-22	ww28668	BOLD:AAR9799	Adult	New South Wales	Temora	-34.448	147.536	Agromyzidae sp.	Chromatomyia syngenesiae	Sonchus spp	OR038623		Negative		Negative
68	SLMWW069-22	ww28669		Adult	New South Wales	Temora	-34.448	147.536	Agromyzidae sp.	Chromatomyia syngenesiae	Sonchus spp	OR038624		Negative		Negative
69	SLMWW070-22	ww28670	BOLD:AAR9799	Adult	New South Wales	Temora	-34.448	147.536	Agromyzidae sp.	Chromatomyia syngenesiae	Sonchus spp	OR038625		Negative		Negative
70	SLMWW071-22	ww28671	BOLD:AAR9799	Adult	New South Wales	Temora	-34.448	147.536	Agromyzidae sp.	Chromatomyia syngenesiae	Sonchus spp	OR038626		Negative		Negative
71	SLMWW072-22	ww28672	BOLD:AAR9799	Adult	New South Wales	Temora	-34.448	147.536	Agromyzidae sp.	Chromatomyia syngenesiae	Sonchus spp	OR038632		Negative		Negative
72	SLMWW073-22	ww28673	BOLD:AAR9799	Adult	New South Wales	Wagga Wagga	-35.0759	147.35	Agromyzidae sp.	Chromatomyia syngenesiae	Glebionis coronaria	OR038638		Negative		Negative
73	SLMWW078-22	ww28678	BOLD:AAR9799	larva	New South Wales	Wagga Wagga	-35.0759	147.35	Agromyzidae sp.	Chromatomyia syngenesiae	Sow thistle	OR038613		Negative		Negative
74	SLMWW082-22	ww28682	BOLD:AAD8670	Adult	New South Wales	Kemps Creek	-33.889	150.783	Liriomyza huidobrensis	Liriomyza huidobrensis	Sow thistle (Sonchus spp)	OR038541		5.32991	82.23	7.27309	84.33
75		ww28683		Adult	New South Wales	Kemps Creek	-33.889	150.783	Liriomyza huidobrensis	Not sequenced	Sow thistle (Sonchus spp)			6.02591	82.2	8.48247	84.33
76		ww28684		Adult	New South Wales	Kemps Creek	-33.889	150.783	Liriomyza huidobrensis	Not sequenced	Sow thistle (Sonchus spp)			5.16917	82.22	7.1103	84.31
77		ww28685		Adult	New South Wales	Kemps Creek	-33.889	150.783	Liriomyza huidobrensis	Not sequenced	Sow thistle (Sonchus spp)			5.62038	82.18	8.11857	84.32
78	SLMWW083-22	ww28686	BOLD:AAD8670	Adult	New South Wales	Kemps Creek	-33.889	150.783	Liriomyza huidobrensis	Liriomyza huidobrensis	Tomato	OR038540		5.05497	82.21	6.55077	84.3
79		ww28687		Adult	New South Wales	Kemps Creek	-33.889	150.783	Liriomyza huidobrensis	Not sequenced	Tomato			4.35168	82.18	6.27761	84.28
80		ww28688		Adult	New South Wales	Kemps Creek	-33.889	150.783	Liriomyza huidobrensis	Not sequenced	Tomato			4.656	82.22	6.42692	84.32
81		ww28689		Adult	New South Wales	Kemps Creek	-33.889	150.783	Liriomyza huidobrensis	Not sequenced	Tomato			4.79976	82.22	6.28469	84.31
82		ww28690		Adult	New South Wales	Kemps Creek	-33.889	150.783	Liriomyza huidobrensis	Not sequenced	Tomato			5.4176	82.25	7.19699	84.35
83		ww28691		Adult	New South Wales	Kemps Creek	-33.889	150.783	Liriomyza huidobrensis	Not sequenced	Tomato			5.62552	82.21	8.2527	84.3
84	SLMWW084-22	ww28692	BOLD:AAD8670	Adult	New South Wales	Austral	-33.94	150.809	Liriomyza huidobrensis	Liriomyza huidobrensis	Cucumber	OR038539		5.93056	82.19	6.23846	84.26
85		ww28693		Adult	New South Wales	Austral	-33.94	150.809	Liriomyza huidobrensis	Not sequenced	Cucumber			5.61474	82.2	6.85486	84.28
86		ww28694		Adult	New South Wales	Austral	-33.94	150.809	Liriomyza huidobrensis	Not sequenced	Cucumber			5.61655	82.22	7.59196	84.34
87	SLMWW085-22	ww28695	BOLD:AAD8670	Adult	New South Wales	Kemps Creek	-33.887	150.778	Liriomyza huidobrensis	Liriomyza huidobrensis	Beans	OR038538		5.14266	82.17	6.80586	84.3
88		ww28696		Adult	New South Wales	Kemps Creek	-33.887	150.778	Liriomyza huidobrensis	Not sequenced	Beans			5.15455	82.2	6.99529	84.28
89	SLMWW086-22	ww28697	BOLD:AAD8670	Adult	New South Wales	Kemps Creek	-33.884	150.796	Liriomyza huidobrensis	Liriomyza huidobrensis	Zucchini	OR038537		5.44573	81.97	6.88634	84.28
90		ww28698		Adult	New South Wales	Kemps Creek	-33.884	150.796	Liriomyza huidobrensis	Not sequenced	Zucchini			6.69808	82.29	8.58605	84.3
91		ww28699		Adult	New South Wales	Kemps Creek	-33.884	150.796	Liriomyza huidobrensis	Not sequenced	Zucchini			5.04966	82.31	6.13894	84.31
92		ww28700		Adult	New South Wales	Kemps Creek	-33.884	150.796	Liriomyza huidobrensis	Not sequenced	Zucchini			5.18485	82.29	6.93601	84.31
93		ww28701		adult	Sow thistle, (Sonchus spp)	Austral	-33.9402	150.809	Liriomyza huidobrensis	Not sequenced	huidobrensis?			5.94625	82.24	7.18274	84.26
94		ww28702		adult	Sow thistle, (Sonchus spp)	Austral	-33.9402	150.809	Liriomyza huidobrensis	Not sequenced	huidobrensis?			5.67886	82.24	6.7719	84.24
95	SLMWW087-22	ww28703	BOLD:AAR9799	Adult	New South Wales	Wagga Wagga	-35.14	147.36	Agromyzidae sp.	Chromatomyia syngenesiae	Sow thistle (Sonchus spp)	OR038605		Negative		Negative
96		ww28704		Adult	New South Wales	Kemps Creek	-33.9096	150.763	Liriomyza huidobrensis	Not sequenced	Cucumber			5.53998	82.27	6.87922	84.24
97		ww28705		Adult	New South Wales	Kemps Creek	-33.9096	150.763	Liriomyza huidobrensis	Not sequenced	Cucumber			5.56446	82.23	6.68139	84.24
98		ww28706		Adult	New South Wales	Kemps Creek	-33.9096	150.763	Liriomyza huidobrensis	Not sequenced	Cucumber			5.46338	82.25	6.80795	84.27
99		ww28707		Adult	New South Wales	Kemps Creek	-33.9096	150.763	Liriomyza huidobrensis	Not sequenced	Cucumber			5.61042	82.25	7.15077	84.27
100	SLMWW088-22	ww28708	BOLD:AAD8670	Adult	New South Wales	Kemps Creek	-33.889	150.783	Liriomyza Huidobrensis?	Liriomyza huidobrensis	Cucumber	OR038536		5.91467	82.38	9.49108	84.45
101	SLMWW089-22	ww28709	BOLD:AAD8670	Adult	New South Wales	Kemps Creek	-33.889	150.783	Liriomyza Huidobrensis?	Liriomyza huidobrensis	Cucumber	OR038535		8.82141	82.41	10.582	84.49
102	SLMWW090-22	ww28710	BOLD:AAD8670	Adult	New South Wales	Kemps Creek	-33.889	150.783	Liriomyza Huidobrensis?	Liriomyza huidobrensis	Cucumber	OR038534		6.15229	82.43	9.69506	84.44
103		ww28711		Adult	New South Wales	Kemps Creek	-33.8872	150.778	Liriomyza huidobrensis	Not sequenced	Cucumber			6.88995	82.25	10.1675	84.19
104		ww28712		Adult	New South Wales	Kemps Creek	-33.8872	150.778	Liriomyza huidobrensis	Not sequenced	Cucumber			5.84542	82.33	7.55237	84.26
105		ww28713		Adult	New South Wales	Kemps Creek	-33.8872	150.778	Liriomyza huidobrensis	Not sequenced	Cucumber			6.11126	82.29	7.63807	84.28
106		ww28714		Adult	New South Wales	Kemps Creek	-33.889	150.783	Liriomyza huidobrensis	Not sequenced	Cucumber			6.66126	82.26	9.48267	84.19
107		ww28715		Adult	New South Wales	Kemps Creek	-33.889	150.783	Liriomyza huidobrensis	Not sequenced	Cucumber			6.75892	82.26	7.40105	84.25
108	SLMWW091-22	ww28716	BOLD:AAD8670	Adult	New South Wales	Kemps Creek	-33.889	150.783	Liriomyza huidobrensis	Liriomyza huidobrensis	Cucumber	OR038533		6.24772	82.22	7.36114	84.22
109	SLMWW092-22	ww28717	BOLD:ABX5699	Adult	Queensland	Aratula	-27.967	152.53	Liriomyza sp.	Agromyzidae	Fat hen	OR038459		Negative		Negative
110	SLMWW093-22	ww28718	BOLD:AAR9799	Adult	Queensland	Mt Sylvia	-27.733	152.224	Agromyzidae sp.	Chromatomyia syngenesiae	Sow thistle	OR038603		Negative		Negative
111	SLMWW094-22	ww28719	BOLD:AAR9799	Adult	Queensland	Mt Sylvia	-27.733	152.224	Agromyzidae sp.	Chromatomyia syngenesiae	Sow thistle	OR038602		Negative		Negative
112	SLMWW095-22	ww28720	BOLD:AAR9799	Adult	Queensland	Mt Sylvia	-27.733	152.224	Agromyzidae sp.	Chromatomyia syngenesiae	Sow thistle	OR038601		Negative		Negative
113	SLMWW096-22	ww28721	BOLD:AAR9799	Adult	Queensland	Mt Sylvia	-27.733	152.224	Agromyzidae sp.	Chromatomyia syngenesiae	Sow thistle	OR038600		Negative		Negative
114	SLMWW097-22	ww28722	BOLD:AAR9799	Adult	Queensland	Mt Sylvia	-27.733	152.224	Agromyzidae sp.	Chromatomyia syngenesiae	Sow thistle	OR038599		Negative		Negative
115	SLMWW098-22	ww28723	BOLD:AAV3970	Adult	Queensland	Atkinson Dam	-27.424	152.473	Scaptomyza sp.	Scaptomyza australis	Caliente Rojo mustard	OR038651		Negative		Negative
116	SLMWW099-22	ww28724	BOLD:AAF6806	Adult	Queensland	Atkinson Dam	-27.424	152.473	Agromyzidae sp.	Liriomyza brassicae	Caliente Rojo mustard	OR038461		Negative		Negative
117	SLMWW100-22	ww28725	BOLD:AAF6806	Adult	Queensland	Atkinson Dam	-27.424	152.473	Agromyzidae sp.	Liriomyza brassicae	Caliente Rojo mustard	OR038462		Negative		Negative
118	SLMWW101-22	ww28726	BOLD:AES7518	Adult	Queensland	Atkinson Dam	-27.424	152.473	Chloropidae sp.	sp. indet. #01	Caliente Rojo mustard	OR038452		Negative		Negative
119	SLMWW102-22	ww28727	BOLD:AAV3970	Adult	Queensland	Atkinson Dam	-27.424	152.473	Scaptomyza sp.	Scaptomyza australis	Caliente Rojo mustard	OR038652		Negative		Negative
120	SLMWW103-22	ww28728	BOLD:AES6624	Adult	Queensland	Toowoomba	-27.521	151.957	Tropicomyia polyphyta	Tropicomyia sp.	Tiger lily	OR038656		Negative		Negative
121	SLMWW104-22	ww28729	BOLD:AES6624	Adult	Queensland	Toowoomba	-27.521	151.957	Tropicomyia polyphyta	Tropicomyia sp.	Tiger lily	OR038658		Negative		Negative
122	SLMWW105-22	ww28730	BOLD:AES6624	Adult	Queensland	Toowoomba	-27.521	151.957	Tropicomyia polyphyta	Tropicomyia sp.	Tiger lily	OR038657		Negative		Negative
123	SLMWW106-22	ww28731	BOLD:AAD8670	Adult	Queensland	Wyreema	-27.649	151.833	Agromyzidae sp.	Liriomyza huidobrensis	Wombok	OR038532		6.44602	82.31	9.43423	84.38
124	SLMWW107-22	ww28732	BOLD:AAD8670	Adult	Queensland	Wyreema	-27.649	151.833	Agromyzidae sp.	Liriomyza huidobrensis	Wombok	OR038531		6.27318	82.34	9.61863	84.41
125	SLMWW108-22	ww28733	BOLD:AAD8670	Adult	Queensland	Wyreema	-27.649	151.833	Agromyzidae sp.	Liriomyza huidobrensis	Wombok	OR038530		5.92231	82.33	9.92174	84.38
126	SLMWW109-22	ww28734	BOLD:AAD8670	Adult	Queensland	Wyreema	-27.649	151.833	Agromyzidae sp.	Liriomyza huidobrensis	Wombok	OR038529		6.009	82.31	8.888	84.44
127	SLMWW110-22	ww28735	BOLD:AAD8670	Adult	Queensland	Wyreema	-27.649	151.833	Agromyzidae sp.	Liriomyza huidobrensis	Wombok	OR038528		6.12619	82.31	8.3006	84.42
128	SLMWW111-22	ww28736	BOLD:AAD8670	Adult	Queensland	Wyreema	-27.649	151.833	Agromyzidae sp.	Liriomyza huidobrensis	Bladder ketmia (Hibiscus trionum)	OR038527		6.24668	82.32	8.96648	84.41
129	SLMWW112-22	ww28737	BOLD:AAD8670	Adult	Queensland	Wyreema	-27.649	151.833	Agromyzidae sp.	Liriomyza huidobrensis	Bladder ketmia (Hibiscus trionum)	OR038526		6.38321	82.31	9.97495	84.37
130	SLMWW113-22	ww28738	BOLD:AAD8670	Adult	Queensland	Wyreema	-27.649	151.833	Agromyzidae sp.	Liriomyza huidobrensis	Bladder ketmia (Hibiscus trionum)	OR038525		6.36164	82.3	8.42186	84.46
131	SLMWW114-22	ww28739		Adult	Queensland	Wyreema	-27.649	151.833	Agromyzidae sp.	Liriomyza huidobrensis	Bladder ketmia (Hibiscus trionum)	OR038669		10.6186	82.25
132	SLMWW115-22	ww28740	BOLD:AAG4792	Adult	Queensland	Toowoomba	-27.521	151.957	Agromyzidae sp.	Calycomyza lantanae	Lantana	OR038436		Negative		Negative
133	SLMWW116-22	ww28741	BOLD:AAG4792	Adult	Queensland	Toowoomba	-27.521	151.957	Agromyzidae sp.	Calycomyza lantanae	Lantana	OR038439		Negative		Negative
134	SLMWW117-22	ww28742	BOLD:AAG4792	Adult	Queensland	Toowoomba	-27.521	151.957	Agromyzidae sp.	Calycomyza lantanae	Lantana	OR038437		Negative		Negative
135	SLMWW118-22	ww28743	BOLD:AAG4792	Adult	Queensland	Toowoomba	-27.521	151.957	Agromyzidae sp.	Calycomyza lantanae	Lantana	OR038438		Negative		Negative
136	SLMWW119-22	ww28744	BOLD:AAF6806	adult	Queensland	Atkinson Dam	-27.4242	152.473	Agromyzidae sp.	Liriomyza brassicae	Caliente Rojo mustard	OR038463		Negative		Negative
137	SLMWW121-22	ww28746	BOLD:AES5207	adult	Northern Territory	Berrimah	-12.444	130.93	L. trifolii	L. trifolii	Lab colony F1	OR038577		Negative		Negative
138	SLMWW122-22	ww28747		adult	Northern Territory	Berrimah	-12.444	130.93	L. trifolii	Not sequenced	Lab colony F1			Negative		Negative
139	SLMWW123-22	ww28748	BOLD:AES5207	adult	Northern Territory	Berrimah	-12.444	130.93	L. trifolii	L. trifolii	Lab colony F1	OR038573		Negative
140	SLMWW124-22	ww28749	BOLD:AES5207	adult	Northern Territory	Berrimah	-12.444	130.93	L. trifolii	L. trifolii	Lab colony F1	OR038574		Negative
141	SLMWW125-22	ww28750	BOLD:AES5207	adult	Northern Territory	Berrimah	-12.444	130.93	L. trifolii	L. trifolii	Lab colony F1	OR038581		Negative
142	SLMWW126-22	ww28751	BOLD:AES5207	adult	Northern Territory	Berrimah	-12.444	130.93	L. trifolii	L. trifolii	Lab colony F2	OR038576		Negative
143	SLMWW127-22	ww28752	BOLD:AES5207	adult	Northern Territory	Berrimah	-12.444	130.93	L. trifolii	L. trifolii	Lab colony F2	OR038579		Negative		Negative
144	SLMWW128-22	ww28753	BOLD:AES5207	adult	Northern Territory	Berrimah	-12.444	130.93	L. trifolii	L. trifolii	Lab colony F2	OR038580		Negative
145	SLMWW129-22	ww28754	BOLD:AES5207	adult	Northern Territory	Berrimah	-12.444	130.93	L. trifolii	L. trifolii	Lab colony F2	OR038587		Negative
146	SLMWW132-22	ww28757	BOLD:AAD8670	adult	Queensland	Wyreema	-27.649	151.833	Agromyzidae sp.	Liriomyza huidobrensis	White clover	OR038522		4.24039	82.31	7.96935	84.41
147	SLMWW133-22	ww28758	BOLD:AAD8670	adult	Queensland	Wyreema	-27.649	151.833	Agromyzidae sp.	Liriomyza huidobrensis	White clover	OR038521		3.95546	82.3	8.80639	84.43
148	SLMWW134-22	ww28759	BOLD:AES6624	adult	Queensland	Toowoomba	-27.5215	151.957	Tropicomyia polyphyta	Tropicomyia sp.	Kapoke vine	OR038661		Negative		Negative
149	SLMWW135-22	ww28760	BOLD:ACP1326	adult	New South Wales	Maroota	-33.4605	150.996	Chloropidae sp.	sp. indet. #03	Spinach	OR038441		Negative		Negative
150	SLMWW136-22	ww28761	BOLD:ACP1326	adult	New South Wales	Maroota	-33.4605	150.996	Chloropidae sp.	sp. indet. #03	Spinach	OR038442		Negative		Negative
151	SLMWW137-22	ww28762	BOLD:ACP1326	adult	New South Wales	Maroota	-33.4605	150.996	Chloropidae sp.	sp. indet. #03	Spinach	OR038443		Negative		Negative
152	SLMWW138-22	ww28763	BOLD:ACP1326	adult	New South Wales	Maroota	-33.4605	150.996	Chloropidae sp.	sp. indet. #03	Spinach	OR038445		Negative		Negative
153	SLMWW139-22	ww28764	BOLD:ACP1326	adult	New South Wales	Maroota	-33.4605	150.996	Chloropidae sp.	sp. indet. #03	Spinach	OR038446		Negative		Negative
154	SLMWW140-22	ww28765	BOLD:ACP1326	adult	New South Wales	Maroota	-33.4605	150.996	Chloropidae sp.	sp. indet. #03	Spinach	OR038447		Negative		Negative
155	SLMWW141-22	ww28766	BOLD:ACP1326	adult	New South Wales	Maroota	-33.4605	150.996	Chloropidae sp.	sp. indet. #03	Spinach	OR038448		Negative		Negative
156	SLMWW142-22	ww28767	BOLD:ACP1326	adult	New South Wales	Maroota	-33.4605	150.996	Chloropidae sp.	sp. indet. #03	Spinach	OR038440		Negative		Negative
157	SLMWW143-22	ww28768	BOLD:ACP1326	adult	New South Wales	Maroota	-33.4605	150.996	Chloropidae sp.	sp. indet. #03	Spinach	OR038449		Negative		Negative
158	SLMWW144-22	ww28769	BOLD:ACP1326	adult	New South Wales	Maroota	-33.4605	150.996	Chloropidae sp.	sp. indet. #03	Spinach	OR038450		NT	NT	Negative
159	SLMWW146-22	ww28771	BOLD:AAD8670	adult	New South Wales	Kemps Creek	-33.8888	150.783	Agromyzidae sp.	Liriomyza huidobrensis	Faba beans	OR038520		4.41552	82.19	8.10042	84.32
160	SLMWW147-22	ww28772		adult	New South Wales	Kemps Creek	-33.8888	150.783	Liriomyza Huidobrensis	Not sequenced	Faba beans (open plot sparse plants)			4.22301	82.15	NT	NT
161	SLMWW148-22	ww28773		adult	New South Wales	Kemps Creek	-33.8888	150.783	Liriomyza Huidobrensis	Not sequenced	Faba beans (open plot sparse plants)			4.3417	82.14	NT	NT
162	SLMWW149-22	ww28774		adult	New South Wales	Kemps Creek	-33.8888	150.783	Liriomyza Huidobrensis	Not sequenced	Sow thistle, (Sonchus spp)			5.29114	82.12	NT	NT
163	SLMWW150-22	ww28775		adult	New South Wales	Kemps Creek	-33.8888	150.783	Liriomyza Huidobrensis	Not sequenced	Sow thistle, (Sonchus spp)			4.07752	82.14	NT	NT
164	SLMWW151-22	ww28776		adult	New South Wales	Kemps Creek	-33.8888	150.783	Liriomyza Huidobrensis	Not sequenced	Cucumber			5.13533	82.16	NT	NT
165	SLMWW152-22	ww28777		adult	New South Wales	Kemps Creek	-33.8888	150.783	Liriomyza Huidobrensis	Not sequenced	Tomato			4.49054	82.18	NT	NT
166	SLMWW153-22	ww28778		adult	New South Wales	Kemps Creek	-33.8888	150.783	Liriomyza Huidobrensis	Not sequenced	Tomato			6.50718	82.16	NT	NT
167	SLMWW154-22	ww28779		adult	New South Wales	Maroota	-33.4605	150.996	Liriomyza Huidobrensis	Not sequenced	Lettuce (amongst spinach)			7.2785	82.17	NT	NT
168	SLMWW155-22	ww28780		adult	New South Wales	Maroota	-33.4605	150.996	Liriomyza Huidobrensis	Not sequenced	Lettuce (amongst spinach)			5.20788	82.2	NT	NT
169	SLMWW156-22	ww28781		adult	New South Wales	Kemps Creek	-33.8888	150.783	Liriomyza Huidobrensis	Not sequenced	Faba beans (open plot sparse plants)			5.02335	82.19	NT	NT
170	SLMWW157-22	ww28782		adult	New South Wales	Kemps Creek	-33.8888	150.783	Liriomyza Huidobrensis	Not sequenced	Faba beans (open plot sparse plants)			3.94858	82.15	NT	NT
171	SLMWW158-22	ww28783	BOLD:AAD8670	adult	New South Wales	Maroota	-33.4605	150.996	Liriomyza Huidobrensis	Not sequenced	Spinach	OR038519		5.09835	82.15	0.403472	82.99
172	SLMWW159-22	ww28784	BOLD:AAV3970	adult	New South Wales	Maroota	-33.4605	150.996	Scaptomyza sp.	Scaptomyza australis	Spinach	OR038649		Negative		Negative
173	SLMWW160-22	ww28785		adult	New South Wales	Kemps Creek	-33.8888	150.783	Liriomyza Huidobrensis	Not sequenced	Sow thistle, (Sonchus spp)			4.20885	82.2	NT	NT
174	SLMWW161-22	ww28786		adult	New South Wales	Kemps Creek	-33.8888	150.783	Liriomyza Huidobrensis	Not sequenced	Sow thistle, (Sonchus spp)			5.29144	82.17	NT	NT
175	SLMWW162-22	ww28787		adult	New South Wales	Maroota	-33.4605	150.996	Liriomyza Huidobrensis	Not sequenced	Weed amongst spinach			6.41007	82.13	NT	NT
176	SLMWW163-22	ww28788		adult	New South Wales	Maroota	-33.4605	150.996	Liriomyza Huidobrensis	Not sequenced	Lettuce			3.63782	82.21	NT	NT
177	SLMWW164-22	ww28789		adult	New South Wales	Maroota	-33.4605	150.996	Liriomyza Huidobrensis	Not sequenced	Lettuce			4.70682	82.15	NT	NT
178	SLMWW166-22	ww28791	BOLD:AAD8670	adult	New South Wales	Camden	-33.9845	150.642	Liriomyza Huidobrensis	Not sequenced	Mustard weed	OR038518		4.52397	82.1	0.410417	83.08
179	SLMWW167-22	ww28792	BOLD:AAF6806	adult	New South Wales	Camden	-33.9845	150.642	Liriomyza Huidobrensis	Liriomyza brassicae	Sowthistle	OR038464		Negative		Negative
180	SLMWW168-22	ww28793	BOLD:AAF6806	adult	New South Wales	Camden	-33.9845	150.642	Liriomyza Huidobrensis	Liriomyza brassicae	Sowthistle	OR038465		NT	NT	Negative
181	SLMWW169-22	ww28794		adult	New South Wales	Kemps Creek	-33.8888	150.783	Liriomyza Huidobrensis	Not sequenced	Chickweed			5.55757	82.14	NT	NT
182	SLMWW170-22	ww28795		adult	New South Wales	Kemps Creek	-33.8888	150.783	Liriomyza Huidobrensis	Not sequenced	Chickweed			4.78424	82.13	NT	NT
183	SLMWW171-22	ww28796		adult	New South Wales	Kemps Creek	-33.8888	150.783	Liriomyza Huidobrensis	Not sequenced	Daisyweed			5.59851	82.15	NT	NT
184	SLMWW172-22	ww28797		adult	New South Wales	Kemps Creek	-33.8888	150.783	Liriomyza Huidobrensis	Not sequenced	Amaranthe weed			5.2768	82.12	NT	NT
185	SLMWW173-22	ww28798		adult	New South Wales	Kemps Creek	-33.8888	150.783	Liriomyza Huidobrensis	Not sequenced	Zucchini			4.43609	82.07	NT	NT
186	SLMWW174-22	ww28831		adult	New South Wales	Kemps Creek	-33.8888	150.783	Liriomyza Huidobrensis	Not sequenced	Zucchini			4.57521	82.04	NT	NT
187	SLMWW175-22	ww28832		adult	New South Wales	Kemps Creek	-33.8888	150.783	Liriomyza Huidobrensis	Not sequenced	Capsicum			4.69211	82.14	NT	NT
188	SLMWW176-22	ww28833		adult	New South Wales	Austral	-33.9402	150.809	Liriomyza Huidobrensis	Not sequenced	Beans			7.03607	82.1	NT	NT
189	SLMWW177-22	ww28834		adult	New South Wales	Austral	-33.9402	150.809	Liriomyza Huidobrensis	Not sequenced	Beans			4.08107	82.04	NT	NT
190	SLMWW178-22	ww28835		adult	New South Wales	Austral	-33.9402	150.809	Liriomyza Huidobrensis	Not sequenced	Cucumber (Bay1)			4.58907	82.07	NT	NT
191	SLMWW179-22	ww28836		adult	New South Wales	Austral	-33.9402	150.809	Liriomyza Huidobrensis	Not sequenced	Cucumber (Bay1)			5.21236	82.05	NT	NT
192	SLMWW180-22	ww28837		adult	New South Wales	Austral	-33.9402	150.809	Liriomyza Huidobrensis	Not sequenced	Cucumber (Bay2)			5.17146	81.99	NT	NT
193	SLMWW181-22	ww28838		adult	New South Wales	Austral	-33.9402	150.809	Liriomyza Huidobrensis	Not sequenced	Cucumber (Bay2)			5.90275	81.98	NT	NT
194	SLMWW182-22	ww28839*		larva	Queensland	Mabuiag Island	-9.959	142.187	Liriomyza sp.	Liriomyza sativae	Macroptilium atropurpureum	OR038566		Negative		Negative
195	SLMWW183-22	ww28840*		larva	Queensland	Mabuiag Island	-9.959	142.187	Liriomyza sp.	Liriomyza sativae	Macroptilium atropurpureum	OR038565		Negative		Negative
196	SLMWW184-22	ww28841*		larva	Queensland	Mabuiag Island	-9.959	142.187	Liriomyza sp.	Liriomyza sativae	Macroptilium atropurpureum	OR038569		Negative		Negative
197	SLMWW185-22	ww28842*		larva	Queensland	Mabuiag Island	-9.959	142.187	Liriomyza sp.	Liriomyza sativae	Macroptilium atropurpureum	OR038568		Negative		Negative
198	SLMWW186-22	ww28843*		larva	Queensland	Mabuiag Island	-9.959	142.187	Liriomyza sp.	Liriomyza sativae	Macroptilium atropurpureum	OR038567		Negative		Negative
199	SLMWW187-22	ww28844*	BOLD:AAV3970	adult	New South Wales	Theresa Park	-33.984	150.642	Scaptomyza sp.	Scaptomyza australis	Baby spinach	OR038654		Negative		Negative
200	SLMWW188-22	ww28845*	BOLD:AAV3970	adult	New South Wales	Theresa Park	-33.984	150.642	Scaptomyza sp.	Scaptomyza australis	Baby spinach	OR038643		Negative		Negative
201	SLMWW189-22	ww28846*	BOLD:AAV3970	adult	New South Wales	Theresa Park	-33.984	150.642	Scaptomyza sp.	Scaptomyza australis	Baby spinach	OR038644		Negative		Negative
202	SLMWW190-22	ww28847*	BOLD:AAV3970	adult	New South Wales	Theresa Park	-33.984	150.642	Scaptomyza sp.	Scaptomyza australis	Baby spinach	OR038645		Negative		Negative
203	SLMWW191-22	ww28848*	BOLD:AAV3970	adult	New South Wales	Theresa Park	-33.984	150.642	Scaptomyza sp.	Scaptomyza australis	Baby spinach	OR038646		Negative		Negative
204	SLMWW192-22	ww28849*	BOLD:AAD8670	adult	New South Wales	Theresa Park	-33.984	150.642	Agromyzidae sp.	Liriomyza Huidobrensis	Baby spinach	OR038517		10.4167	82.44		84.32
205	SLMWW193-22	ww28850*	BOLD:ACI6435	adult	New South Wales	Theresa Park	-33.984	150.642	Liriomyza brassicae?	Liriomyza chenopodii	Baby spinach	OR038485		Negative		Negative
206	SLMWW194-22	ww28851*	BOLD:AAD8670	adult	New South Wales	Theresa Park	-33.984	150.642	Liriomyza brassicae?	Liriomyza huidobrensis	Baby spinach	OR038516		4.3212	82.29
207	SLMWW195-22	ww28852*	BOLD:ACI6435	adult	New South Wales	Theresa Park	-33.984	150.642	Liriomyza brassicae?	Liriomyza chenopodii	Baby spinach	OR038486		Negative		Negative
208	SLMWW196-22	ww28853*	BOLD:ACI6435	adult	New South Wales	Theresa Park	-33.984	150.642	Liriomyza brassicae?	Liriomyza chenopodii	Baby spinach	OR038487		Negative		Negative
209	SLMWW197-22	ww28854*	BOLD:ACP1326	adult	New South Wales	Theresa Park	-33.984	150.642	Chloropidae sp.	sp. indet. #03	Baby spinach	OR038444		Negative		Negative
210	SLMWW198-22	ww28855*	BOLD:AAH9408	adult	New South Wales	Maroota	-33.46	150.996	unkown	Phytomyza plantaginis	plantain weed	OR038590		Negative		Negative
211	SLMWW200-22	ww28857*	BOLD:AAH9408	adult	New South Wales	Maroota	-33.46	150.996	unkown	Phytomyza plantaginis	plantain weed	OR038588		Negative		Negative
212	SLMWW201-22	ww28858*	BOLD:AAR9799	adult	New South Wales	Maroota	-33.46	150.996	Agromyzidae sp.	Chromatomyia syngenesiae	Sowthistle	OR038627		Negative		Negative
213	SLMWW202-22	ww28859*	BOLD:AAR9799	adult	New South Wales	Maroota	-33.46	150.996	Agromyzidae sp.	Chromatomyia syngenesiae	Sowthistle	OR038628		Negative		Negative
214	SLMWW203-22	ww28860*	BOLD:AAR9799	adult	New South Wales	Maroota	-33.46	150.996	Agromyzidae sp.	Chromatomyia syngenesiae	Sowthistle	OR038629		Negative		Negative
215	SLMWW204-22	ww28861*	BOLD:AAH9408	adult	New South Wales	Maroota	-33.46	150.996	unkown	Phytomyza plantaginis	plantain weed	OR038591		Negative		Negative
216	SLMWW205-22	ww28862*	BOLD:AAR9799	adult	New South Wales	Austral	-33.94	150.809	Agromyzidae sp.	Chromatomyia syngenesiae	Sowthistle	OR038630		Negative		Negative
217	SLMWW207-22	ww28864*	BOLD:AAR9799	adult	New South Wales	Kemps Creek	-33.889	150.783	Agromyzidae sp.	Chromatomyia syngenesiae	Sowthistle	OR038622		Negative		Negative
218	SLMWW208-22	ww28865*	BOLD:AAR9799	adult	New South Wales	Kemps Creek	-33.889	150.783	Agromyzidae sp.	Chromatomyia syngenesiae	Sowthistle	OR038597		Negative		Negative
219	SLMWW209-22	ww28866*	BOLD:AAR9799	adult	New South Wales	Kemps Creek	-33.889	150.783	Agromyzidae sp.	Chromatomyia syngenesiae	Sowthistle	OR038598		Negative		Negative
220	SLMWW213-22	ww28870*	BOLD:AAD8670	adult	Queensland	Wyreema - Diack	-27.649	151.833	unkown	Liriomyza huidobrensis	Sonchus oleraceus	OR038515		8.87343	82.55		84.37
221	SLMWW214-22	ww28871*	BOLD:AAD8670	adult	Queensland	Wyreema - Diack	-27.649	151.833	unkown	Liriomyza huidobrensis	Sonchus oleraceus	OR038514		8.61023	82.47		84.39
222	SLMWW215-22	ww28872*	BOLD:AAD8670	adult	Queensland	Wyreema - Diack	-27.649	151.833	unkown	Liriomyza huidobrensis	Sonchus oleraceus	OR038513		9.8142	82.59		84.43
223	SLMWW216-22	ww28873*	BOLD:AAD8670	adult	Queensland	Wyreema - Diack	-27.649	151.833	unkown	Liriomyza huidobrensis	Sonchus oleraceus	OR038512		8.78883	82.59		84.43
224	SLMWW217-22	ww28874*	BOLD:AAD8670	adult	Queensland	Wyreema - Diack	-27.649	151.833	unkown	Liriomyza huidobrensis	Wombok	OR038511		7.94995	82.58		84.42
225	SLMWW218-22	ww28875*	BOLD:AAD8670	adult	Queensland	Wyreema - Diack	-27.649	151.833	unkown	Liriomyza huidobrensis	Wombok	OR038510		9.01169	82.6		84.46
226	SLMWW219-22	ww28876*	BOLD:AAD8670	adult	Queensland	Wyreema - Diack	-27.649	151.833	unkown	Liriomyza huidobrensis	Wombok	OR038509		8.93776	82.57		84.41
227	SLMWW220-22	ww28877*	BOLD:AAD8670	adult	Queensland	Wyreema - Diack	-27.649	151.833	unkown	Liriomyza huidobrensis	Wombok	OR038508		8.70632	82.54		84.42
228	SLMWW221-22	ww28878*	BOLD:AAD8670	adult	Queensland	Wyreema - Diack	-27.649	151.833	unkown	Liriomyza huidobrensis	Wombok	OR038507		8.81736	82.62		84.44
229	SLMWW222-22	ww28879*	BOLD:AAD8670	adult	Queensland	Wyreema - Diack	-27.649	151.833	unkown	Liriomyza huidobrensis	Celery	OR038506		8.24958			84.51
230	SLMWW223-22	ww28880*	BOLD:AAD8670	adult	Queensland	Wyreema - Diack	-27.649	151.833	unkown	Liriomyza huidobrensis	Celery	OR038505		8.2912			84.42
231	SLMWW224-22	ww28881*	BOLD:AAD8670	adult	Queensland	Wyreema - Diack	-27.649	151.833	unkown	Liriomyza huidobrensis	Celery	OR038504		8.48467			84.43
232	SLMWW225-22	ww28882*	BOLD:AAD8670	adult	Queensland	Wyreema - Diack	-27.649	151.833	unkown	Liriomyza huidobrensis	Celery	OR038503		8.6455	82.52		84.42
233	SLMWW226-22	ww28883*	BOLD:AAD8670	adult	Queensland	Wyreema - Diack	-27.649	151.833	unkown	Liriomyza huidobrensis	Celery	OR038502		7.92432	82.52		84.41
234	SLMWW227-22	ww28884*	BOLD:AAF6806	adult	Queensland	Mt Whitesone	-27.655	152.162	Agromyzidae sp.	Liriomyza brassicae	Brassica weed	OR038473		Negative		Negative
235	SLMWW230-22	ww28887*	BOLD:AAF6806	adult	Queensland	Mt Whitesone	-27.655	152.162	Agromyzidae sp.	Liriomyza brassicae	Brassica weed	OR038470		Negative		Negative
236	SLMWW231-22	ww28888*	BOLD:AAF6806	adult	Queensland	Mt Whitesone	-27.655	152.162	Agromyzidae sp.	Liriomyza brassicae	Brassica weed	OR038469		Negative		Negative
237	SLMWW232-23	ww28921		Adult	Western Australia	Oria	-15.8503	128.729	L. trifolii	L. trifolii	Sunflower	OR038586		Negative		Negative
238	SLMWW233-23	ww28922		Adult	Western Australia	Oria	-15.8503	128.729	L. trifolii	L. trifolii	Sunflower	OR038575		Negative		Negative
239	SLMWW234-23	ww28923		Adult	Western Australia	Oria	-15.8503	128.729	L. trifolii	L. trifolii	Sunflower	OR038582		NT	NT	Negative
240	SLMWW235-23	ww28924		Adult	Western Australia	Oria	-15.8503	128.729	L. trifolii	L. trifolii	Sunflower	OR038583		Negative		Negative
241	SLMWW236-23	ww28925		Adult	Western Australia	Oria	-15.8503	128.729	L. trifolii	L. trifolii	Sunflower	OR038584		Negative		Negative
242	SLMWW237-23	ww28926		Adult	Western Australia	Oria	-15.8503	128.729	L. trifolii	L. trifolii	Sunflower	OR038585		Negative		Negative
243	SLMWW238-23	ww28927		Adult	Western Australia	Oria	-15.8503	128.729	L. trifolii	L. trifolii	Sunflower	OR038570		Negative		Negative
244	SLMWW239-23	ww28928		Adult	Western Australia	Oria	-15.8503	128.729	L. trifolii	L. trifolii	Sunflower	OR038571		Negative		Negative
245	SLMWW240-23	ww28929		Adult	Western Australia	Oria	-15.8503	128.729	L. trifolii	L. trifolii	Sunflower	OR038572		Negative		Negative
246	SLMWW241-23	ww28930		Adult	Western Australia	Oria	-15.8503	128.729	L. trifolii	L. trifolii	Sunflower	OR038578		NT	NT	Negative
247	SLMWW245-23	ww28934		Adult	New South Wales	Camden	-33.9845	150.642	Agromyzidae sp.	Liriomyza Chenopodii	Baby spinach	OR038475		Negative		Negative
248	SLMWW246-23	ww28935		Adult	New South Wales	Camden	-33.9845	150.642	Agromyzidae sp.	Liriomyza Chenopodii	Baby spinach	OR038476		Negative		Negative
249	SLMWW247-23	ww28936		Adult	New South Wales	Camden	-33.9845	150.642	Agromyzidae sp.	Liriomyza Chenopodii	Baby spinach	OR038477		Negative		Negative
250	SLMWW248-23	ww28937		Adult	New South Wales	Camden	-33.9845	150.642	Agromyzidae sp.	Liriomyza Chenopodii	Baby spinach	OR038478		Negative		Negative
251	SLMWW249-23	ww28938		Adult	New South Wales	Camden	-33.9845	150.642	Agromyzidae	Scaptomyza australis	Baby spinach	OR038648		Negative		Negative
252	SLMWW250-23	ww28939		Adult	New South Wales	Camden	-33.9845	150.642	Agromyzidae	Scaptomyza australis	Baby spinach	OR038647		Negative		Negative
253	SLMWW251-23	ww28940		Adult	New South Wales	Camden	-33.9845	150.642	Agromyzidae sp.	Liriomyza Chenopodii	Baby spinach	OR038479		Negative		Negative
254	SLMWW252-23	ww28941		Adult	New South Wales	Maroota	-33.4605	150.996	Agromyzidae	Scaptomyza australis	Spinach	OR038653		Negative		Negative
255	SLMWW253-23	ww28942		Adult	New South Wales	Camden	-33.9845	150.642	Agromyzidae	Scaptomyza flava	Sowthistle	OR038655		Negative		Negative
256	SLMWW254-23	ww28959		Adult	Queensland	Mt Whitesone	-27.654	152.165	Agromyzidae sp.	Liriomyza huidobrensis	Cauliflower	OR038501		NT	NT	8.41274	84.52
257	SLMWW255-23	ww28960		Adult	Queensland	Mt Whitesone	-27.654	152.165	Agromyzidae sp.	Liriomyza brassicae	Cauliflower	OR038468		NT	NT	Negative
258	SLMWW256-23	ww28961		Adult	Queensland	Mt Whitesone	-27.654	152.165	Liriomyza Huidobrensis	not sequenced	Cauliflower			NT	NT	9.18479	84.5
259	SLMWW257-23	ww28962		Adult	Queensland	Mt Whitesone	-27.654	152.165	Agromyzidae sp.	sp. indet. #02	Clover	OR038662		NT	NT	Negative
260	SLMWW258-23	ww28963		Adult	Queensland	Mt Whitesone	-27.654	152.165	Agromyzidae sp.	sp. indet. #02	Clover	OR038659		NT	NT	Negative
261	SLMWW259-23	ww28964		Adult	Queensland	Mt Whitesone	-27.654	152.165	Agromyzidae sp.	sp. indet. #02	Clover	OR038663		NT	NT	Negative
262	SLMWW260-23	ww28965		Adult	Queensland	Mt Whitesone	-27.654	152.165	Agromyzidae sp.	sp. indet. #02	Clover	OR038660		NT	NT	Negative
263	SLMWW261-23	ww28966		Adult	Queensland	Mt Whitesone	-27.654	152.165	Agromyzidae sp.	Liriomyza huidobrensis	Clover	OR038500		NT	NT	8.65475	84.5
264	SLMWW262-23	ww28967		Adult	Queensland	Tenthill region	-27.6114	152.228	Liriomyza Huidobrensis	not sequenced	Marshmallow weed			NT	NT	8.76572	84.54
265	SLMWW263-23	ww28968		Adult	Queensland	Tenthill region	-27.6114	152.228	Liriomyza Huidobrensis	not sequenced	Marshmallow weed			NT	NT	8.86267	84.52
266	SLMWW264-23	ww28969		Adult	Queensland	Tenthill region	-27.6114	152.228	Liriomyza Huidobrensis	not sequenced	Marshmallow weed			NT	NT	10.876	84.41
267	SLMWW265-23	ww28970		Adult	Queensland	Tenthill region	-27.6114	152.228	Liriomyza Huidobrensis	not sequenced	Marshmallow weed			NT	NT	8.3629	84.51
268	SLMWW266-23	ww28971		Adult	Queensland	Tenthill region	-27.6114	152.228	Liriomyza Huidobrensis	not sequenced	Marshmallow weed			NT	NT	8.45181	84.55
269	SLMWW269-23	ww28974	BOLD:AAD8670	Adult	Queensland	Tenthill region	-27.6114	152.228	Agromyzidae sp.	Liriomyza huidobrensis	Fireweed - Senecio spp	OR038499		NT	NT	15.6346	84.42
270	SLMWW270-23	ww28975		Adult	Queensland	Tenthill region	-27.6114	152.228	Agromyzidae sp.	Liriomyza huidobrensis	Fireweed - Senecio spp	OR038498		NT	NT	8.16217	84.55
271	SLMWW271-23	ww28976		Adult	Queensland	Tenthill region	-27.6114	152.228	Agromyzidae sp.	Liriomyza huidobrensis	Fireweed - Senecio spp	OR038497		NT	NT	7.77511	84.54
272	SLMWW272-23	ww28977		Adult	Queensland	Tenthill region	-27.6114	152.228	Liriomyza Huidobrensis	not sequenced	Thorn Apple - Datura ferox			NT	NT	8.56592	84.52
273	SLMWW273-23	ww28978		Adult	Queensland	Tenthill region	-27.6114	152.228	Liriomyza Huidobrensis	not sequenced	Thorn Apple - Datura ferox			NT	NT	8.36163	84.49
274	SLMWW274-23	ww28979		Adult	Queensland	Tenthill region	-27.6114	152.228	Liriomyza Huidobrensis	not sequenced	Thorn Apple - Datura ferox			NT	NT	7.97292	84.5
275	SLMWW275-23	ww28980		Adult	Queensland	Tenthill region	-27.6114	152.228	Liriomyza Huidobrensis	not sequenced	Thorn Apple - Datura ferox			NT	NT	8.43222	84.47
276	SLMWW276-23	ww28981		Adult	Queensland	Tenthill region	-27.6114	152.228	Liriomyza Huidobrensis	not sequenced	Thorn Apple - Datura ferox			NT	NT	8.53026	84.48
277	SLMWW277-23	ww28982		Adult	Queensland	Tenthill region	-27.6114	152.228	Liriomyza Huidobrensis	not sequenced	Tomatoes			NT	NT	11.8308	84.43
278	SLMWW278-23	ww28983		Adult	Queensland	Tenthill region	-27.6114	152.228	Liriomyza Huidobrensis	not sequenced	Tomatoes			NT	NT	8.49402	84.54
279	SLMWW279-23	ww28984		Adult	Queensland	Tenthill region	-27.6114	152.228	Liriomyza Huidobrensis	not sequenced	Tomatoes			NT	NT	8.66869	84.52
280	SLMWW280-23	ww28985		Adult	Queensland	Tenthill region	-27.6114	152.228	Liriomyza Huidobrensis	not sequenced	Tomatoes			NT	NT	9.10663	84.48
281	SLMWW281-23	ww28986		Adult	Queensland	Tenthill region	-27.6114	152.228	Liriomyza Huidobrensis	not sequenced	Tomatoes			NT	NT	8.12744	84.46
282	SLMWW282-23	ww28987		Adult	Queensland	Tenthill region	-27.6114	152.228	Liriomyza Huidobrensis	not sequenced	Fat hen			NT	NT	7.9481	84.44
283	SLMWW283-23	ww28988		Adult	Queensland	Tenthill region	-27.6114	152.228	Liriomyza Huidobrensis	not sequenced	Fat hen			NT	NT	8.79648	84.41
284	SLMWW284-23	ww28989		Adult	Queensland	Tenthill region	-27.6114	152.228	Liriomyza Huidobrensis	not sequenced	Fat hen			NT	NT	8.08416	84.41
285	SLMWW285-23	ww28990		Adult	Queensland	Tenthill region	-27.6114	152.228	Liriomyza Huidobrensis	not sequenced	Fat hen			NT	NT	7.85476	84.41
286	SLMWW286-23	ww28991		Adult	Queensland	Tenthill region	-27.6114	152.228	Liriomyza Huidobrensis	not sequenced	Clover			NT	NT	9.06943	84.33
287	SLMWW287-23	ww28992		Adult	Queensland	Tenthill region	-27.6114	152.228	Liriomyza Huidobrensis	not sequenced	Clover			NT	NT	10.2574	84.25
288	SLMWW288-23	ww28993		Adult	Queensland	Tenthill region	-27.6114	152.228	Liriomyza Huidobrensis	not sequenced	Clover			NT	NT	7.88231	84.39
289	SLMWW289-23	ww28994		Adult	Queensland	Tenthill region	-27.6114	152.228	Liriomyza Huidobrensis	not sequenced	Clover			NT	NT	8.39987	84.36
290	SLMWW290-23	ww28995		Adult	Queensland	Tenthill region	-27.6114	152.228	Liriomyza Huidobrensis	not sequenced	Clover			NT	NT	8.36658	84.41
291	SLMWW291-23	ww28996		Adult	Queensland	Tenthill region	-27.6114	152.228	Liriomyza Huidobrensis	not sequenced	Wireweed			NT	NT	8.29037	84.42
292	SLMWW292-23	ww28997		Adult	Queensland	Tenthill region	-27.6114	152.228	Liriomyza Huidobrensis	not sequenced	Wireweed			NT	NT	8.75206	84.43
293	SLMWW293-23	ww28998		Adult	Queensland	Tenthill region	-27.6114	152.228	Liriomyza Huidobrensis	not sequenced	Wireweed			NT	NT	8.53268	84.42
294	SLMWW294-23	ww28999		Adult	Queensland	Tenthill region	-27.6114	152.228	Liriomyza Huidobrensis	not sequenced	Wireweed			NT	NT	8.31103	84.49
295	SLMWW295-23	ww29000		Adult	Queensland	Tenthill region	-27.6114	152.228	Liriomyza Huidobrensis	not sequenced	Wireweed			NT	NT	8.64055	84.49
296	SLMWW296-23	ww29301		Adult	Queensland	Gatton Research Facility	-27.5472	152.331	Liriomyza Huidobrensis	not sequenced	Giant pigweed - Trianthema portulacastrum			NT	NT	8.07812	84.43
297	SLMWW297-23	ww29302		Adult	Queensland	Gatton Research Facility	-27.5472	152.331	Liriomyza Huidobrensis	not sequenced	Giant pigweed - Trianthema portulacastrum			NT	NT	7.9769	84.49
298	SLMWW298-23	ww29303		Adult	Queensland	Aratula	-27.9753	152.541	Agromyzidae sp.	Liriomyza huidobrensis	Green beans	OR038496		NT	NT	7.18859	84.51
299	SLMWW299-23	ww29304		Adult	Queensland	Aratula	-27.9753	152.541	Agromyzidae sp.	Liriomyza huidobrensis	Green beans	OR038495		NT	NT	7.19195	84.51
300	SLMWW300-23	ww29305		Adult	Queensland	Aratula	-27.9753	152.541	Agromyzidae sp.	Liriomyza huidobrensis	Green beans	OR038494		NT	NT	6.73709	84.51
301	SLMWW301-23	ww29306	BOLD:AAD8670	Adult	Queensland	Aratula	-27.9753	152.541	Agromyzidae sp.	Liriomyza huidobrensis	Green beans	OR038493		NT	NT	6.96673	84.39
302	SLMWW302-23	ww29307		Adult	Queensland	Aratula	-27.9753	152.541	Agromyzidae sp.	Liriomyza huidobrensis	Green beans	OR038492		NT	NT	6.78214	84.51
303	SLMWW303-23	ww29308		Adult	Queensland	Aratula	-27.9753	152.541	Agromyzidae sp.	Liriomyza huidobrensis	Cobblers peg - Bidens pilosa	OR038491		NT	NT	6.80926	84.52
304	SLMWW304-23	ww29309		Adult	Queensland	Aratula	-27.9753	152.541	Agromyzidae sp.	Liriomyza huidobrensis	Cobblers peg - Bidens pilosa	OR038490		NT	NT	8.55525	84.46
305	SLMWW305-23	ww29310		Adult	Queensland	Aratula	-27.9753	152.541	Agromyzidae sp.	Liriomyza huidobrensis	Wild gooseberry - Physalis angulata	OR038489		NT	NT	10.7667	84.45
306	SLMWW306-23	ww29311		Adult	Queensland	Spring Creef via Clifton	-27.9571	151.973	Liriomyza Huidobrensis	Not sequenced	Chard - Beta vulgaris			7.54477	82.29	NT	NT
307	SLMWW307-23	ww29312		Adult	Queensland	Spring Creef via Clifton	-27.9571	151.973	Liriomyza Huidobrensis	Not sequenced	Chard - Beta vulgaris			7.4681	82.29	NT	NT
308	SLMWW308-23	ww29313		Adult	Queensland	Spring Creef via Clifton	-27.9571	151.973	Liriomyza Huidobrensis	Not sequenced	Chard - Beta vulgaris			7.42882	82.27	NT	NT
309	SLMWW309-23	ww29314		Adult	Queensland	Spring Creef via Clifton	-27.9571	151.973	Liriomyza Huidobrensis	Not sequenced	Tatsoi - Brassica rapa var. narinosa			6.90877	82.25	NT	NT
310	SLMWW310-23	ww29315		Adult	Queensland	Spring Creef via Clifton	-27.9571	151.973	Liriomyza Huidobrensis	Not sequenced	Tatsoi - Brassica rapa var. narinosa			6.81131	82.24	NT	NT
311	SLMWW311-23	ww29316		Adult	Queensland	Spring Creef via Clifton	-27.9571	151.973	Liriomyza Huidobrensis	Not sequenced	Tatsoi - Brassica rapa var. narinosa			7.15746	82.23	NT	NT
312	SLMWW312-23	ww29317		Adult	Queensland	Spring Creef via Clifton	-27.9571	151.973	Liriomyza Huidobrensis	Not sequenced	Mizuma - Brassica rapa var. niposinica			6.82364	82.22	NT	NT
313	SLMWW313-23	ww29318		Adult	Queensland	Spring Creef via Clifton	-27.9571	151.973	Liriomyza Huidobrensis	Not sequenced	Mizuma - Brassica rapa var. niposinica			6.73803	82.22	NT	NT
314	SLMWW314-23	ww29319		Adult	Queensland	Spring Creef via Clifton	-27.9571	151.973	Liriomyza Huidobrensis	Not sequenced	Mizuma - Brassica rapa var. niposinica			6.81468	82.24	NT	NT
315	SLMWW315-23	ww29320		Adult	Queensland	Spring Creef via Clifton	-27.9571	151.973	Liriomyza Huidobrensis	Not sequenced	Spinach - Spinacia oleracea			7.52859	82.25	NT	NT
316	SLMWW316-23	ww29321		Adult	Queensland	Spring Creef via Clifton	-27.9571	151.973	Liriomyza Huidobrensis	Not sequenced	Spinach - Spinacia oleracea			7.65152	82.21	NT	NT
317	SLMWW317-23	ww29322		Adult	Queensland	Spring Creef via Clifton	-27.9571	151.973	Liriomyza Huidobrensis	Not sequenced	Spinach - Spinacia oleracea			7.36663	82.21	NT	NT
318	SLMWW318-23	ww29323		Adult	Queensland	Spring Creef via Clifton	-27.9571	151.973	Liriomyza Huidobrensis	Not sequenced	Cos lettuce			7.058	82.2	NT	NT
319	SLMWW319-23	ww29324		Adult	Queensland	Spring Creef via Clifton	-27.9571	151.973	Liriomyza Huidobrensis	Not sequenced	Cos lettuce			7.30001	82.18	NT	NT
320	SLMWW320-23	ww29325		Adult	Queensland	Spring Creef via Clifton	-27.9571	151.973	Liriomyza Huidobrensis	Not sequenced	Cos lettuce			7.23174	82.19	NT	NT
321	SLMWW321-23	ww29326		Adult	Queensland	Withcott	-27.5271	152.079	Liriomyza Huidobrensis	Not sequenced	Vegetable seedlings			6.99317	82.18	NT	NT
322	SLMWW322-23	ww29327		Adult	Queensland	Withcott	-27.5271	152.079	Liriomyza Huidobrensis	Not sequenced	Vegetable seedlings			7.61496	82.2	NT	NT
323	SLMWW323-23	ww29328		Adult	Queensland	Withcott	-27.5271	152.079	Liriomyza Huidobrensis	Not sequenced	Vegetable seedlings			6.65058	82.18	NT	NT
324	SLMWW326-23	ww29331		Adult	Queensland	Toowoomba	-27.5215	151.957	Agromyzidae sp.	Liriomyza brassicae	Nasturtium - Tropaeolum majus	OR038467		Negative		NT	NT
325	SLMWW327-23	ww29332		Adult	Queensland	Toowoomba	-27.5215	151.957	Agromyzidae sp.	Liriomyza brassicae	Nasturtium - Tropaeolum majus	OR038466		Negative		NT	NT
326		Colony fly		adult	Northern Territory	Berrimah	-12.444	130.93	Liriomyza trifolii	Not sequenced	Lab colony F1			Negative		NT	NT
327		Colony fly		adult	Northern Territory	Berrimah	-12.444	130.93	Liriomyza trifolii	Not sequenced	Lab colony F1			Negative		NT	NT
328		Colony fly		adult	Northern Territory	Berrimah	-12.444	130.93	Liriomyza trifolii	Not sequenced	Lab colony F1			Negative		NT	NT
329		Colony fly		adult	Northern Territory	Berrimah	-12.444	130.93	Liriomyza trifolii	Not sequenced	Lab colony F1			Negative		NT	NT
330		Colony fly		adult	Northern Territory	Berrimah	-12.444	130.93	Liriomyza trifolii	Not sequenced	Lab colony F1			Negative		NT	NT
331		Colony fly		adult	Northern Territory	Berrimah	-12.444	130.93	Liriomyza trifolii	Not sequenced	Lab colony F2			Negative		NT	NT
332		Colony fly		adult	Northern Territory	Berrimah	-12.444	130.93	Liriomyza trifolii	Not sequenced	Lab colony F2			Negative		NT	NT
